# Supplementary material for: Defensin-Like ZmES4 Mediates Pollen Tube Burst in Maize via Opening of the Potassium Channel KZM1
Source: PubMed Central journal article supplement (PMC2879413; doi:10.1371/journal.pbio.1000388), 2010-06-01
Supplement: pbio.1000388.s005.pdf [file pbio.1000388.s005.pdf]

|           | C1                                | C2                                                                                                 | C3     | C4    | C5 | C6 | C7 | C8 |    |
|-----------|-----------------------------------|----------------------------------------------------------------------------------------------------|--------|-------|----|----|----|----|----|
| ZmES1     | MEPSRGRLSAAAVLLMTLLVVA--AMRAVFA   | RDCLTQSTRLPGHLCVPSDCAIGCRABGNGYTGGRCLISPIPLGILC                                                    | GVTRCP | PSMTT |    |    |    |    | 92 |
| ZmES4     | MESSRGRLSAAGVLLMT-LLMVA--AMRAVFA  | RDCLTQSTRLPGHLCVPSDCAIGCRABGNGYTGGRCLISPIPLGILC                                                    | GVTRCP | PSMTT |    |    |    |    | 91 |
| ZmLCR1    | MESSRRTQPAIILLLLIVT-----TVAQAA    | RECEKTSERPLG-AOXASDMCANVCRGG--FSGGRCS--TTRRR                                                       |        |       |    |    |    |    | 74 |
| ZmLCR2    | MELSRRRTAVLLVMLLLS-AMVG-PVAVAF    | RTCSQSRRPLG-PCRRSVMCANVCRGG--FSGGRCS--GTRRR                                                        |        |       |    |    |    |    | 79 |
| ZmLCR3    | MKA--QVAAATVLLVLLS-----IFAAEA     | RTCSQSRRPLG-PCRRSVMCANVCRGG--FSGGRCS--GTRRR                                                        |        |       |    |    |    |    | 85 |
| OsLCR1    | MAPSRMVASAFLLLAILVA-TMVG-TTKVAF   | RHCLSOSRRPLG-MCVSSMNCANVCRGG--FDGGRCSHGLRR                                                         |        |       |    |    |    |    | 80 |
| OsLCR2    | MCLLAAL-----APAQSSV               | FPCTTSLRPLG-FCMVEDNCANVCRGG--FVGGGRCS--TVVRR                                                       |        |       |    |    |    |    | 63 |
| OsLCR3    | MEASRRVFSAMLLHVLLLAATGMGGPVHVAF   | RTCSQSRRPLG-PCRRSVMCANVCRGG--FSGGRCS--GTRRR                                                        |        |       |    |    |    |    | 81 |
| AtLCR69   | MRLSMRRLISAVLIHFHIFVA--TGMGPVTVFA | RTCSQSRRPLG-PCRRSVMCANVCRGG--FSGGRCS--GTRRR                                                        |        |       |    |    |    |    | 77 |
| AtLCR71   | MSCFFALYDILYGLYN-SLG--GSVTVEA     | RICKSRQRRPLG-PCVSEDNCANVCRGG--FDGGRCS--LLRR                                                        |        |       |    |    |    |    | 73 |
| AtLCR72   | MRLSRLISALLMSVMLLFA--TGMGP--VEA   | RTCSQSRRPLG-PCRRSVMCANVCRGG--FSGGRCS--GTRRR                                                        |        |       |    |    |    |    | 73 |
| AtLCR74   | MRN--KFAAFLLLVLFSS-----GIIGGG     | RTCSQSRRPLG-PCRRSVMCANVCRGG--FSGGRCS--GTRRR                                                        |        |       |    |    |    |    | 73 |
| PgLCR1    | MADMGVCSLSALF-LLVLLVI-SIGMQLSLAFA | RTCTPSSRRPLG-VCASSMNCANVCRGG--FSGGRCSHGLRR                                                         |        |       |    |    |    |    | 83 |
| PaSPI1B   | MADMGVCSLSALF-LLVLLVI-SIGMQLSLAFA | RTCTPSSRRPLG-VCASSMNCANVCRGG--FSGGRCSHGLRR                                                         |        |       |    |    |    |    | 83 |
| consensus |                                   | RxCxxxxx <b>b</b> f <b>b</b> G--CxxxxxCa <b>x</b> C <b>b</b> xEG--f--GbC-----bb----CxC <b>b</b> PC |        |       |    |    |    |    |    |
