# Supplementary material for: Defensin-Like ZmES4 Mediates Pollen Tube Burst in Maize via Opening of the Potassium Channel KZM1
Source: PubMed Central journal article supplement (PMC2879413; doi:10.1371/journal.pbio.1000388), 2010-06-01

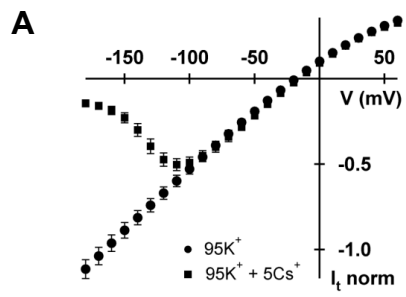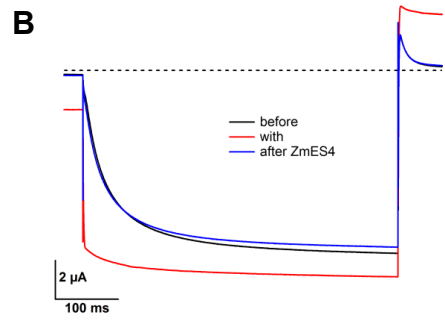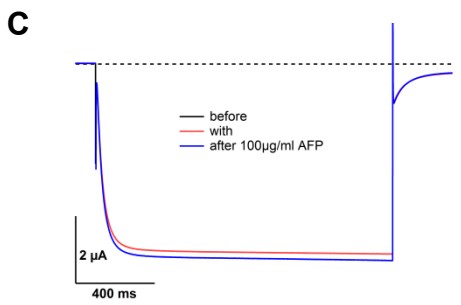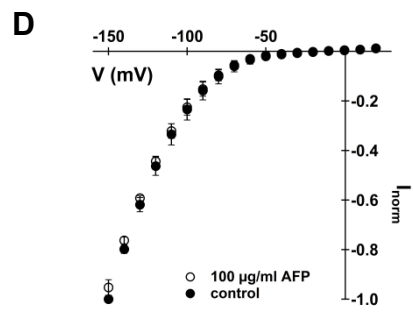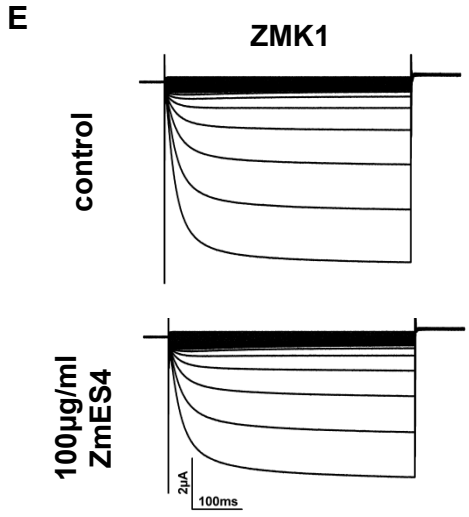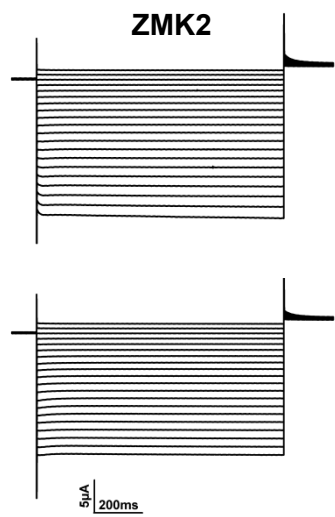

Supplement: pbio.1000388.s007.pdf [file pbio.1000388.s007.pdf]
